# Supplementary material for: Attenuation of Dupuytren’s fibrosis via targeting of the STAT1 modulated IL-13Rα1 response
Source: PubMed Central journal article supplement (PMC7351483; doi:10.1126/sciadv.aaz8272), 2020-07-10
Supplement: aaz8272_SM.pdf [file aaz8272_SM.pdf]

## Supplementary Materials for

### **Attenuation of Dupuytren's fibrosis via targeting of the STAT1 modulated IL-13R $\alpha$ 1 response**

Moed Akbar, Emma Garcia-Melchor, Sabarinadh Chilaka, Kevin J. Little, Shatakshi Sood, James H. Reilly, Foo Y. Liew, Iain B. McInnes, Neal L. Millar\*

\*Corresponding author. Email: [neal.millar@glasgow.ac.uk](mailto:neal.millar@glasgow.ac.uk)

Published 10 July 2020, *Sci. Adv.* **6**, eaaz8272 (2020)  
DOI: [10.1126/sciadv.aaz8272](https://doi.org/10.1126/sciadv.aaz8272)

#### **This PDF file includes:**

Figs. S1 to S3

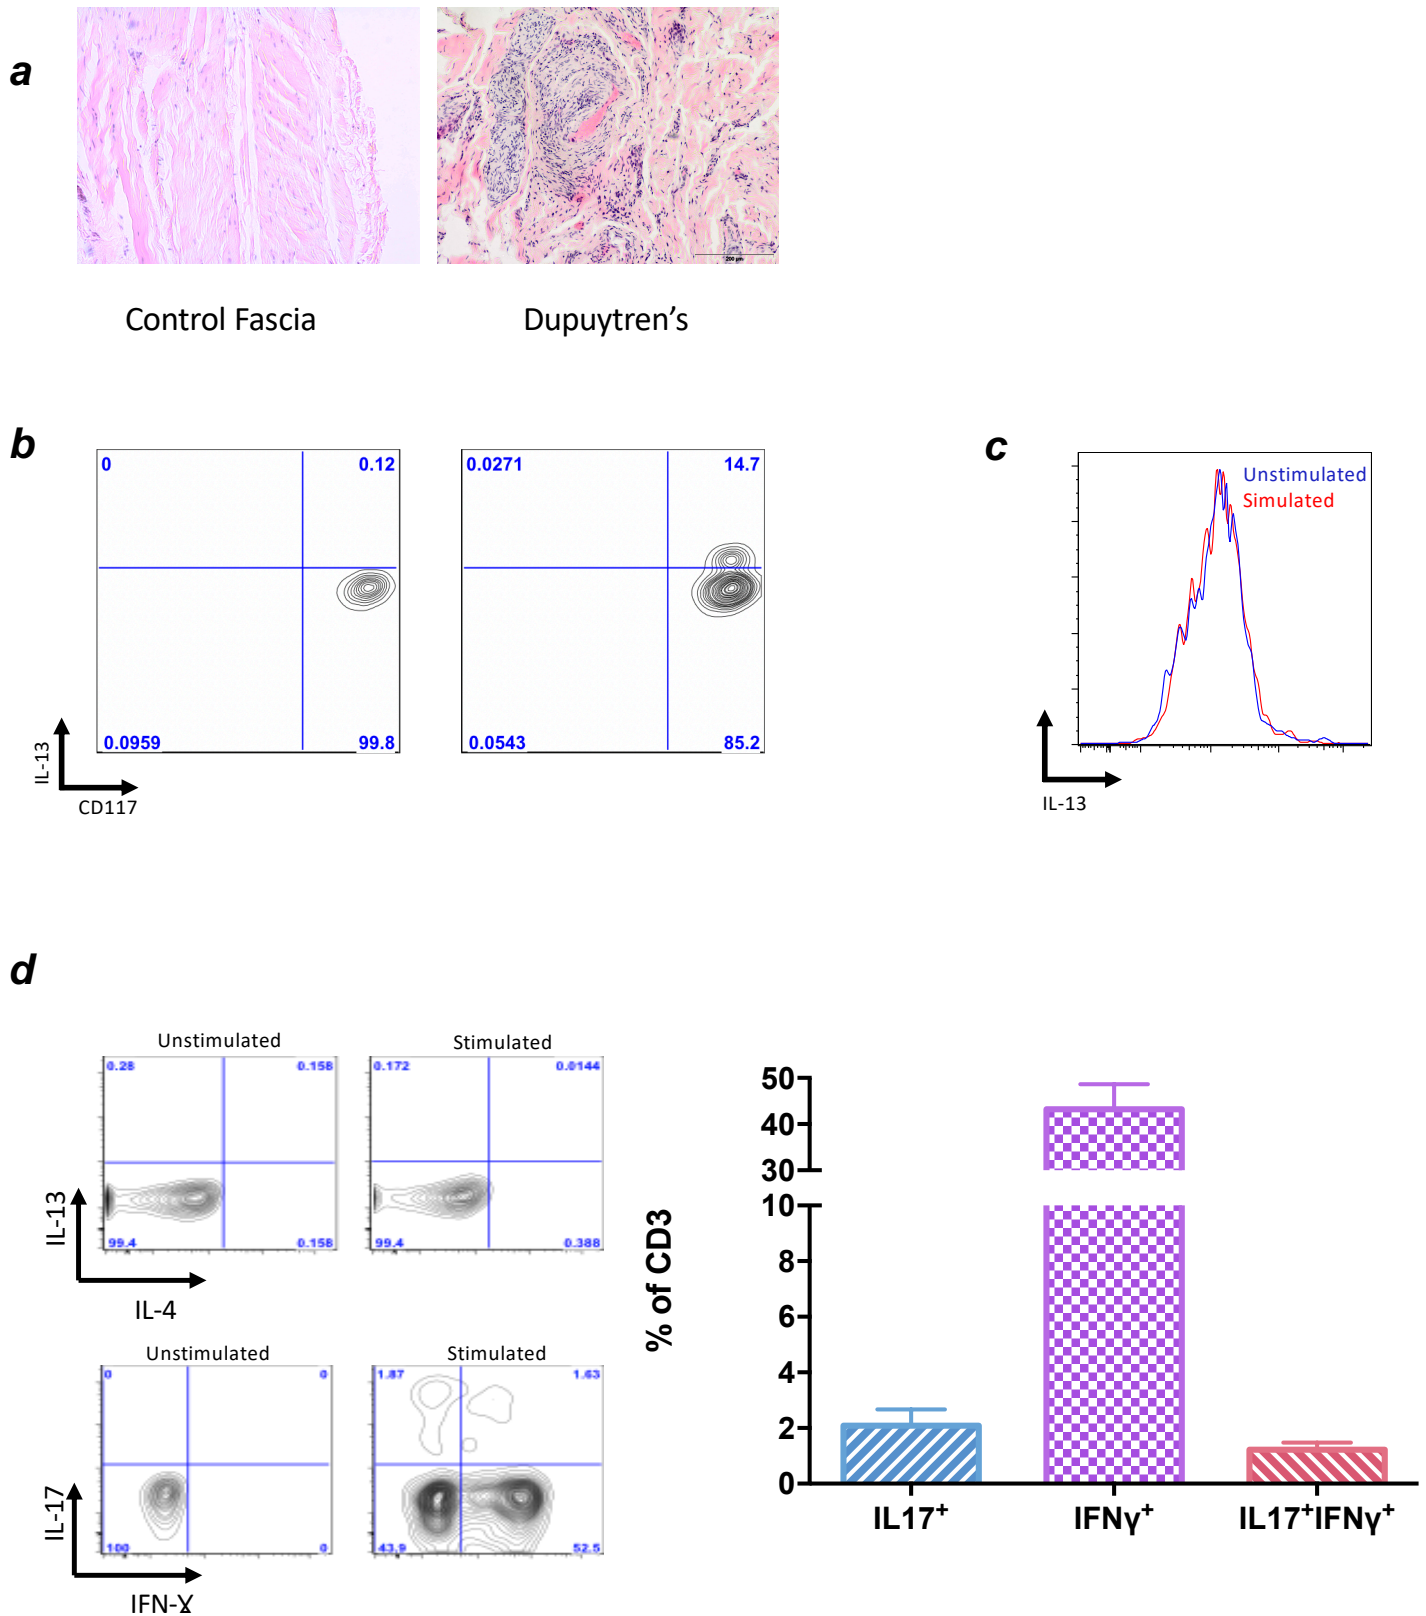

**Supplementary Figure 1.** Inflammatory cells in Dupuytren's Disease. (A) Histological staining of control fascia and Dupuytren's tissue stained with H&E, at 10 × magnification. (B) Representative intracellular flow cytometry plot of unstimulated and stimulated CD117<sup>+</sup> mast cells, from disaggregated Dupuytren's tissue, stained with anti-IL13. (C) Representative flow cytometry histogram of intracellular IL-13 in unstimulated and stimulated CD64<sup>+</sup> macrophages, from disaggregated Dupuytren's tissue. (D) Characterisation of T-cells in disaggregated Dupuytren's tissue. Representative flow cytometric plots of unstimulated and stimulated CD3<sup>+</sup> T-Cells following intracellular staining with antibodies against IL-4, IL-13, IL-17 and IFN alpha. Graph displays the proportion of T-cells positive for IFN-alpha.

**a**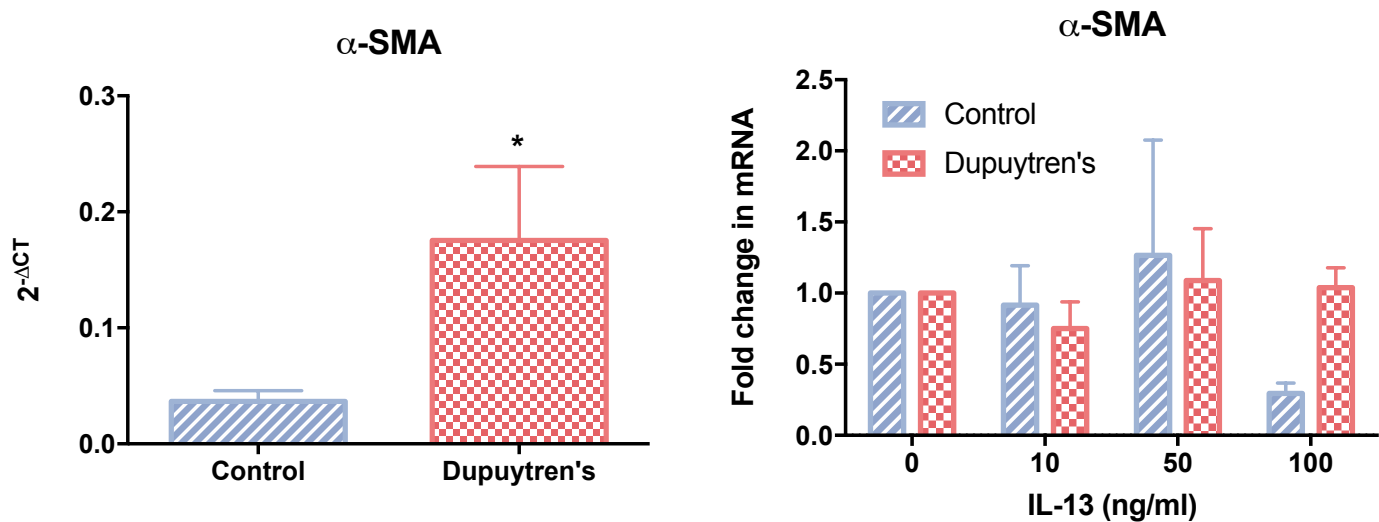**b**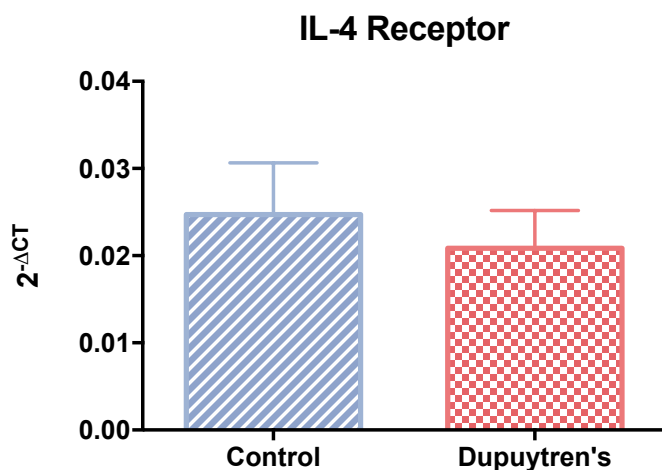

**Supplementary Figure 2.** (A)  $\alpha$ -SMA expression in Dupuytren's disease.  $\alpha$ -SMA expression in control fibroblasts and Dupuytren's myofibroblast,  $2^{-\Delta CT}$  relative to GAPDH, mean  $\pm$  SEM,  $n > 5$ ,  $*p < 0.05$ .  $\alpha$ -SMA expression in control fibroblasts and Dupuytren's myofibroblast following IL-13 treatment,  $n = 6$ . mRNA gene expression expressed as fold change following normalisation to housekeeping gene (GAPDH) and then to relevant untreated cells. (B) IL-4 receptor expression in control fibroblasts and Dupuytren's myofibroblast,  $2^{-\Delta CT}$  relative to GAPDH, mean  $\pm$  SEM,  $n = 6$ .

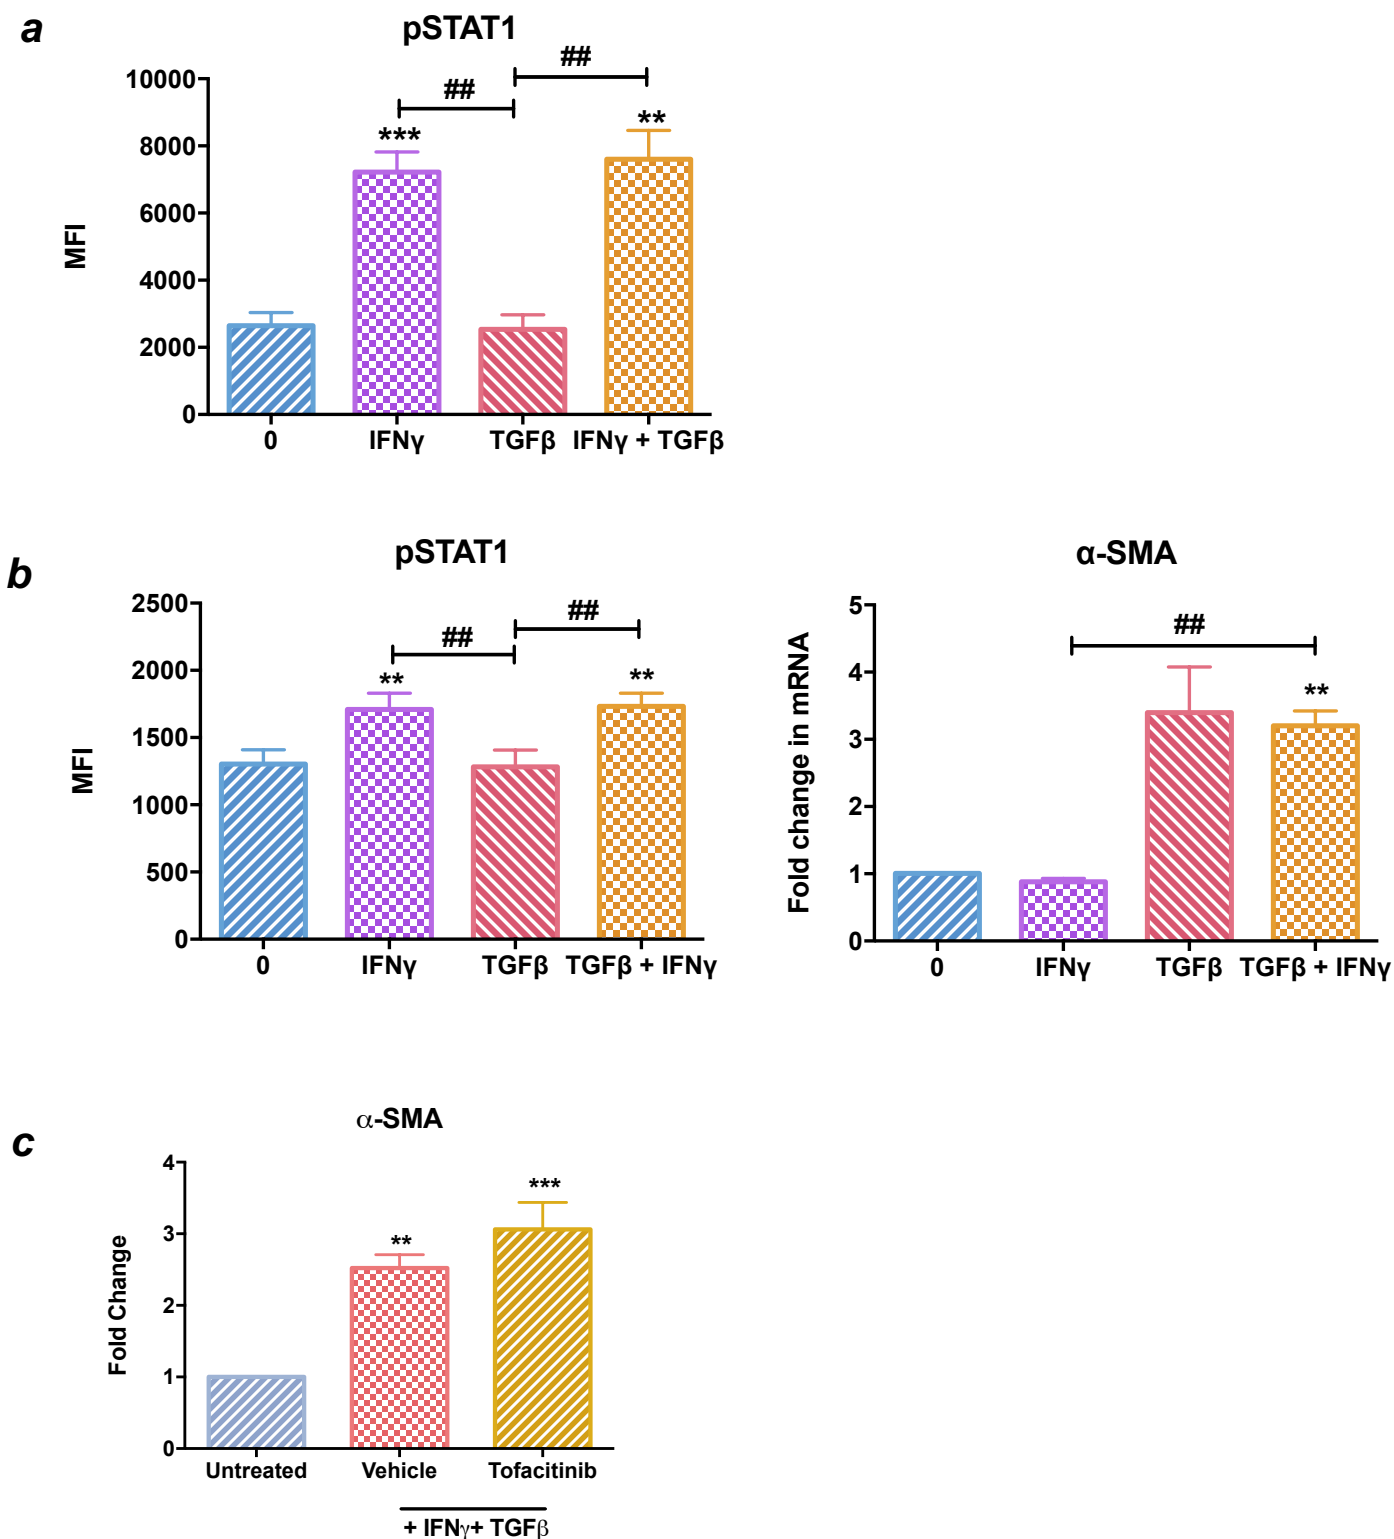

**Supplementary Figure 3. IFN $\gamma$  in Dupuytren's disease.** (A) STAT1 phosphorylation and in human mast cells following IFN- $\gamma$  and TGF- $\beta$  exposure. (B) STAT1 phosphorylation and  $\alpha$ -SMA gene expression in control fibroblasts following IFN- $\gamma$  and TGF- $\beta$  exposure. (C)  $\alpha$ -SMA gene expression in control fibroblasts following IFN- $\gamma$  and TGF- $\beta$  exposure. Fibroblasts were pre-treated with tofacitinib or vehicle control (0.001% DMSO) for 30 mins prior to cytokine stimulation. All results are mean  $\pm$  SEM, mRNA gene expression expressed as fold change following normalisation to housekeeping gene (GAPDH) and then to relevant untreated cells,  $n > 4$ , \* indicates significant difference from untreated cells, \* $p < 0.05$ , \*\* $p < 0.01$ , \*\*\* $p < 0.001$ , \*\*\*\* $p < 0.001$ . # $p < 0.05$ , ## $p < 0.01$ , ### $p < 0.001$ , #### $p < 0.0001$ .
